# Supplementary material
Source: publisher site journal article supplement (https://www.dovepress.com/get_supplementary_file.php?f=282567.docx)
Supplement: Supplementary file 1 [file get_supplementary_file.php]

## Supplementary material: Questionnaire

## Consent form

Good Morning/Afternoon, My name is ________________________. I am a trained data collector for the research, Prevalence of clinically active trachoma, and associated risk factors among preschool-aged children in Arba Minch Health and Demographic surveillance site, Gamo Zone, Southern Ethiopia2019 by Arba Minch University research team. Your child is selected as a matter of chance; and nothing special is attached to it. The interview and clinical examination will take about 40 minutes. If your child participates in the study, there will not be any harm to your child or your family. We will not record your child and your identifiers and the information that you give us will be kept confidential. The information you provide will not be used for another purpose than this study. There will not be incentives in terms of money; rather the information you provide will help the government and concerned bodies to reduce the prevalence of trachoma in your community and the country as well. Your participation is voluntary and you have the right to withdraw the interview at any time. Your decision about not to participate is respected. If you have any questions on what we have talked so far you are welcome. If you have any question at any time you can contact the principal investigator through the following address:

Mustefa Glagn Mobile No: +251913976776; Email: mustesami02@gmail.com

I hope, you understand the purpose of this study. Are you willing to participate in this study?

1. Yes 2. No. If yes, thank you for your willingness.

If No, give thanks and go to the next study participant.

## English version questionnaire

English version pre-tested and structured questionnaire for the Prevalence of clinically active trachoma and associated risk factors among preschool-aged children in Arba Minch Health and Demographic surveillance site, Gamo Zone, Southern Ethiopia 2019.

Questionnaire code number _______________

Name of the data collector________________ Date of interview _________Signature ________

Name of the supervisor ___________________ Date of checked _______Signature _________

| **Part I: Socio-demographic factors** | | | | | | |
| --- | --- | --- | --- | --- | --- | --- |
| S.no. | Question | | | Response | | |
| 1.0 | Date of birth of the child | | | (dd/mm/yyyy) / / | | |
| 1.1 | What is the sex of the child? | | | 1. Male 2. Female | | |
| 1.2 | Total number of HH members in No. | | | ____________ | | |
| 1.3 | Total number of u5 children | | | _____________ | | |
| 1.4 | Who is the caregiver of the child | | | 1. Mother 2. Father 3. Relative 4. other | | |
| 1.5 | What is the marital status of the mother /caregiver? | | | 1.single  2.Married | | |
| 1.6 | What is the educational status of the mother /caregiver | | | 1. not read & write 2. read & write only 3. primary education 4. Secondary education & prep. 5. Vocational and higher education. | | |
| 1.7 | What is Occupation of the head of  Household? | | | 1. Unemployed 2. Farmer 3. Merchant 4. Housewife 5. Gov’t employee 6. Other/specify | | |
| 1.8 | What is the age of the mother /caregiver? | | | -----------------years | | |
| 1.9 | Educational status of the father | | | 1. not read & write 2. read & write only 3. primary education 4. Secondary education & prep. 5. Vocational and higher education. | | |
| Part II: Environmental Factors | | | | | | |
| 2.1 | | Time to obtain water | 1. ≤30 min 2. > 30min | | | |
| 2.2 | | Source of water | 1.Pipe  2. Protected well  3. Protected spring  4. Unprotected spring | | | |
| 2.3 | | Amount of water used per day | 1.Less than 20 L  2.20–40 L  3.60–80 L  4. Greater than 80 L | | | |
| 2.4 | | Is there animal pens in the compound (ask and observe) | 1. Yes 2. No | | | |
| 2.5 | | Is there a separate room for the domestic animal ( ask and observe) | 1. Yes, 2. No | | | |
| 2.6 | | Mechanism of disposing of dry waste (ask and observe) | 1. Proper 2. Improper | | | |
| 2.7 | | Functional latrine available (ask and observe) | 1. Yes 2. No | | | |
| 2.8 | | Proper latrine utilization (observe) | 1. Yes 2. No | | | |
|  | | Part III: Child personal Hygiene (selected child) | | | | |
| 3.1 | | Unclean face (observe) | 1. Yes, 2. No | | | |
| 3.2 | | Frequency of washing face | 1. Once per day 2. Two times and above per day | | | |
| 3.3 | | Using of soap when face wash | 1. Yes 2. No | | | |
| 3.4 | | Place where food is cooking | 1. Separately in the living room  2. In the field  3. living room | | | |
| Part IV: Health care facilities | | | | | | |
|  | | Health care facilities | Accessibility ( travel time (thick) | | | |
|  | < 30 minutes | | >30 min but < 2 hrs. | >=2 hrs. |
| 4.1 | | Primary health care facilities  ( HC/Clinic) |  | |  |  |
| 4.2 | | Drug store/vendor |  | |  |  |
| 4.3 | | Trichiasis surgery facility |  | |  |  |

**Part V: Clinical assessment of trachoma**

| 5.1 | World health organization clinical trachoma grading | Trachomatous inflammation follicular (TF) | 1. Yes 2. No |
| --- | --- | --- | --- |
| Trachomatous inflammation intense (TI) | 1. Yes 2. No |
| Trachomatous scarring (TS) | 1. Yes 2. No |
| Trachomatous trichiasis (TT) | 1. Yes 2. No |
| Corneal opacity (CO) | 1. Yes 2. No |
